# Supplementary material for: Upconversion-based nanosystems for fluorescence sensing of pH and H2O2
Source: Royal Society of Chemistry journal article supplement (doi:10.1039/d0na01045f), 2021-01-01
Supplement: d0na01045f1.pdf [file d0na01045f1.pdf]

## Supplementary Information

### Upconversion-based nanosystems for fluorescence sensing of pH and H<sub>2</sub>O<sub>2</sub>

Chunning Sun\* and Michael Gradzielski\*

Stranski-Laboratorium für Physikalische und Theoretische Chemie, Institut für Chemie,  
Technische Universität Berlin, Strasse des 17. Juni 124, 10623 Berlin, Germany

\*Corresponding authors:

E-mail: [chunning.sun@campus.tu-berlin.de](mailto:chunning.sun@campus.tu-berlin.de) (C. Sun), [michael.gradzielski@tu-berlin.de](mailto:michael.gradzielski@tu-berlin.de) (M. Gradzielski)

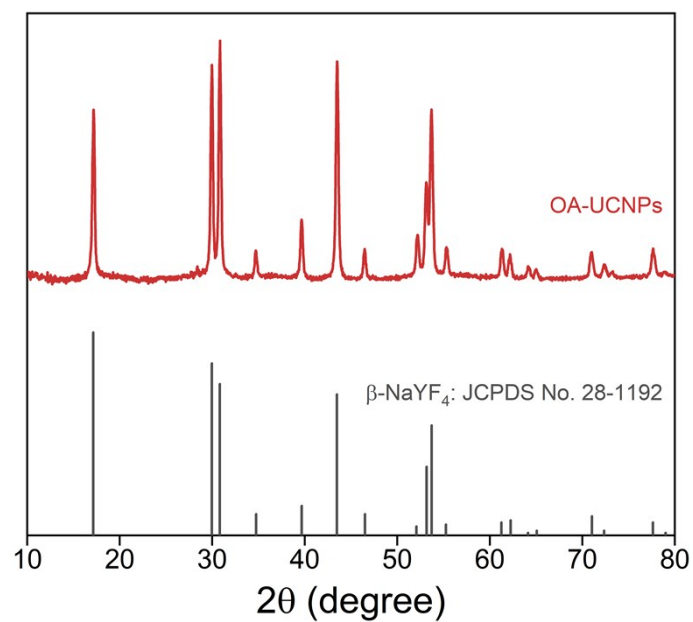

**Fig. S1** XRD patterns of OA-UCNPs and the standard data of hexagonal NaYF<sub>4</sub> (JCPDS No. 28-1192).

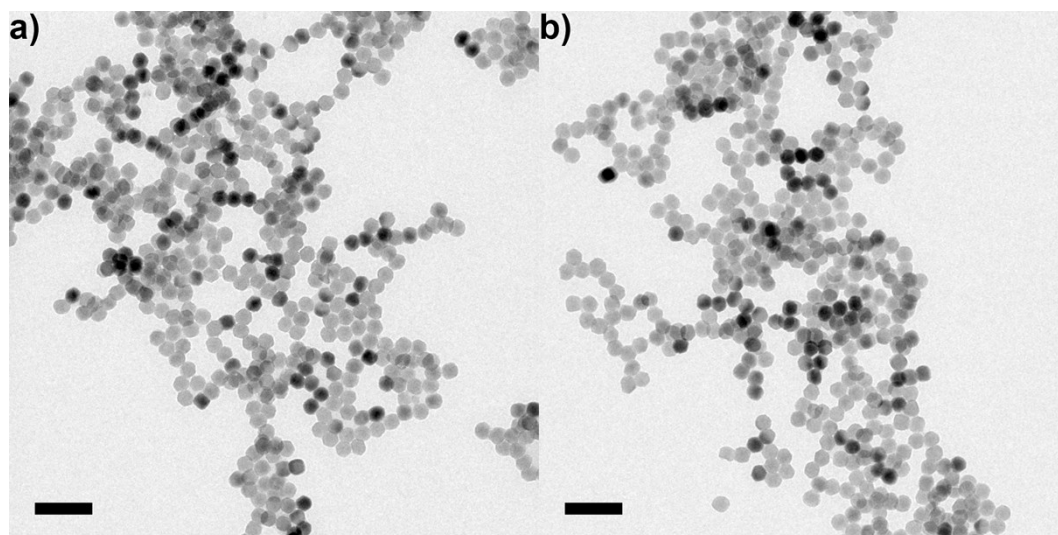

**Fig. S2** TEM images of (a) ligand-free UCNPs and (b) PEI-UCNPs. Scale bars: 100 nm.

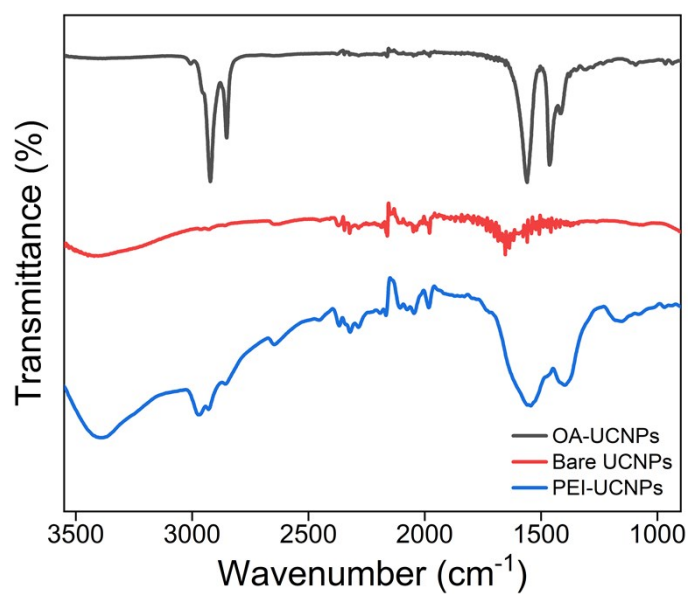

**Fig. S3** FT-IR spectra of OA-, ligand-free, and PEI-UCNPs.

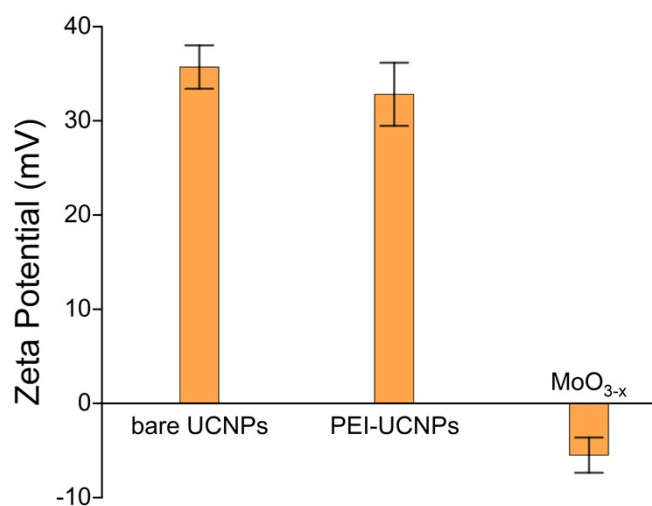

**Fig. S4** Zeta potential of bare UCNPs, PEI-UCNPs, and MoO<sub>3-x</sub> NSs at pH 4.5. Error bars represent the standard deviations of three independent measurements.

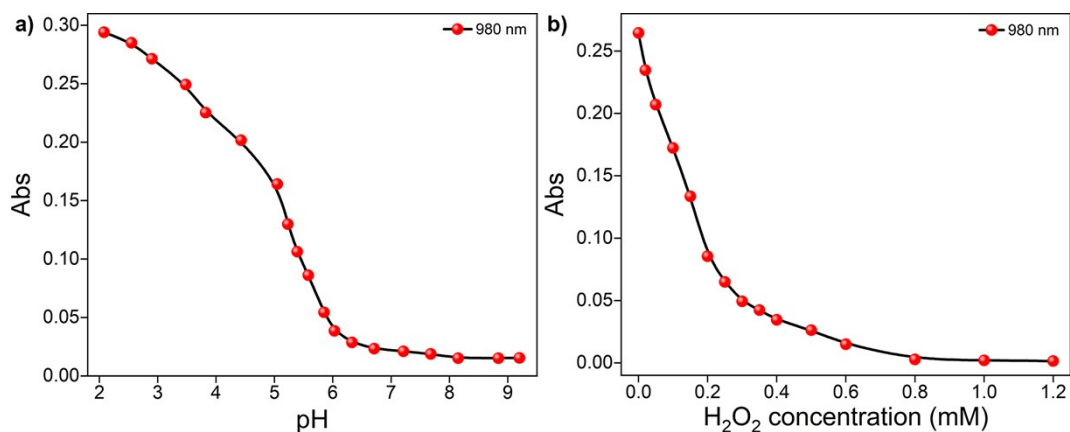

**Fig. S5** (a) The absorbance of MoO<sub>3-x</sub> NSs solution at 980 nm as a function of pH. (b) Absorption intensities of MoO<sub>3-x</sub> NSs solution at 980 nm with the addition of different H<sub>2</sub>O<sub>2</sub> concentrations at pH 4.5. Black lines serve as a guide to the eye.

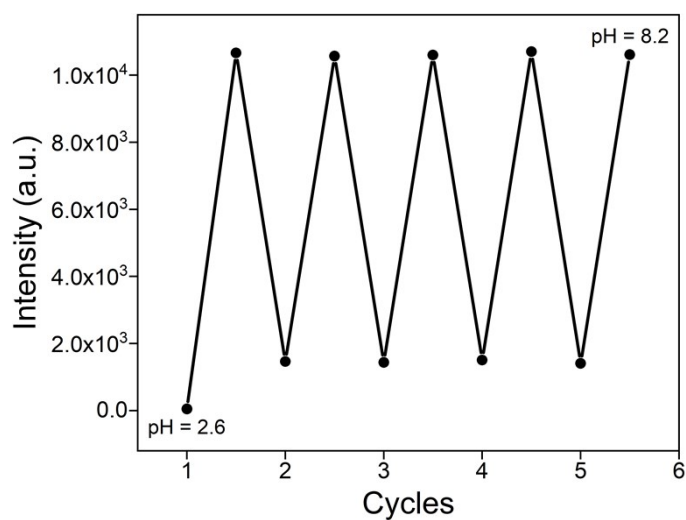

**Fig. S6** Fluorescence intensity of OA-UCNPs at 658 nm in the presence of MoO<sub>3-x</sub> NSs solution by altering the pH value in the non-contact mode.

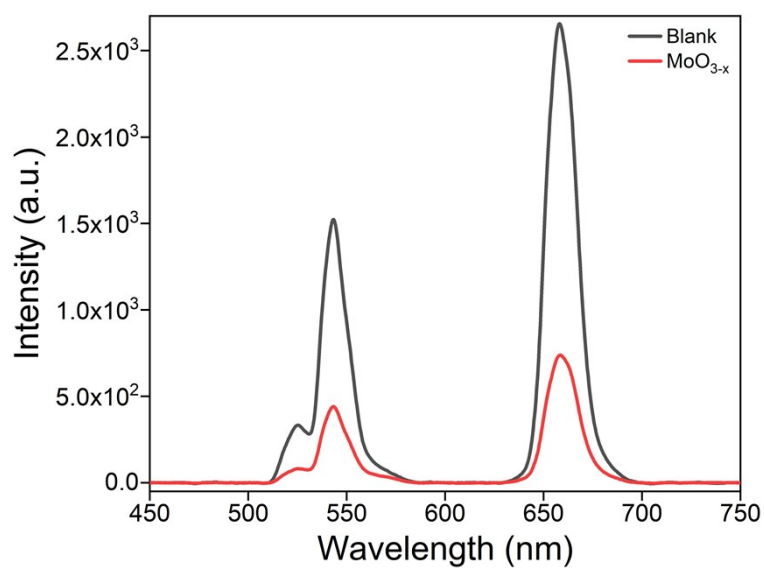

**Fig. S7** UCL spectra of 0.5 mg/mL PEI-UCNPs in the absence and presence of  $\text{MoO}_{3-x}$  NSs solution (0.35 mg/mL) in non-contact mode.

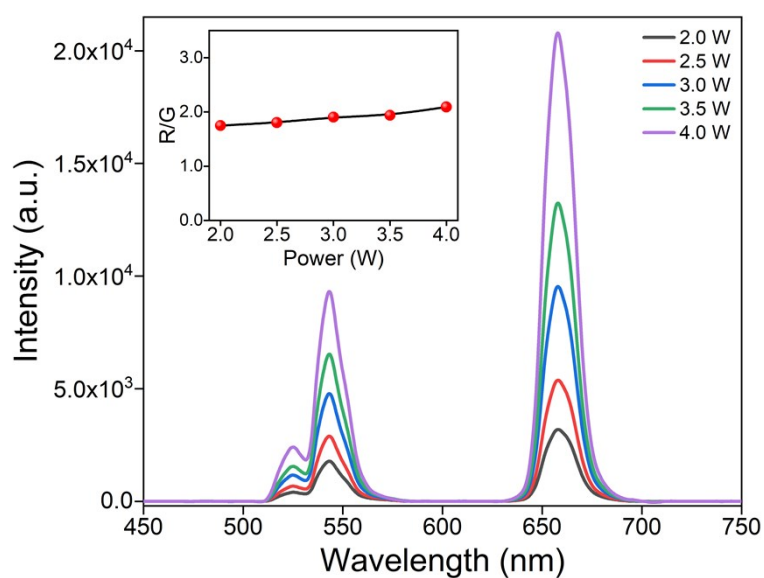

**Fig. S8** UCL spectra of 0.5 mg/mL PEI-UCNPs under excitation at 980 nm with different power. Inset: the relationship between the R/G ratio and laser power.
